# Supplementary material
Source: PubMed Central journal article supplement (PMC5612101)

Supplementary Material for:

Ticks from Diverse Genera Encode Chemokine-Inhibitory Evasin Proteins

**Jenni Hayward, Julie Sanchez, Andrew Perry, Cheng Huang, Manuel Rodriguez Valle,  
Merixell Canals, Richard J. Payne and Martin J. Stone**

### **Supplementary Table**

Table S1. Accession numbers of all sequences in the final evasin database

### **Supplementary Figures**

Figure S1. Simulated fluorescence anisotropy binding curves

Figure S2. Chemokine binding curves of candidate evasins

Figure S3. Chemokine binding affinity profiles of purified evasins

Figure S4. Chemokine inhibition of forskolin-induced cAMP production

**Table S1:** Accession numbers of all sequences in the final evasin database

| <b>Sequence ID</b> | <b>Database</b> | <b>Species</b>                  |
|--------------------|-----------------|---------------------------------|
| KY696668.1         | Genbank         | <i>Ixodes holocyclus</i>        |
| KY696671.1         | Genbank         | <i>Ixodes holocyclus</i>        |
| KY696667.1         | Genbank         | <i>Ixodes holocyclus</i>        |
| KY696674.1         | Genbank         | <i>Rhipicephalus microplus</i>  |
| JAA60714.1         | Genbank         | <i>Rhipicephalus pulchellus</i> |
| G3MSV3_9ACAR       | UniprotKB       | <i>Amblyomma maculatum</i>      |
| G3ML03_9ACAR       | UniprotKB       | <i>Amblyomma maculatum</i>      |
| G3MSV4_9ACAR       | UniprotKB       | <i>Amblyomma maculatum</i>      |
| JAA57173.1         | Genbank         | <i>Rhipicephalus pulchellus</i> |
| JAG92275.1         | Genbank         | <i>Amblyomma americanum</i>     |
| JAA60749.1         | Genbank         | <i>Rhipicephalus pulchellus</i> |
| JAA71836.1         | Genbank         | <i>Ixodes ricinus</i>           |
| JAA70458.1         | Genbank         | <i>Ixodes ricinus</i>           |
| JAA65577.1         | Genbank         | <i>Ixodes ricinus</i>           |
| JAA67769.1         | Genbank         | <i>Ixodes ricinus</i>           |
| JAA67752.1         | Genbank         | <i>Ixodes ricinus</i>           |
| JAA67622.1         | Genbank         | <i>Ixodes ricinus</i>           |
| JAB77289.1         | Genbank         | <i>Ixodes ricinus</i>           |
| JAA67762.1         | Genbank         | <i>Ixodes ricinus</i>           |
| JAA67760.1         | Genbank         | <i>Ixodes ricinus</i>           |
| JAB76903.1         | Genbank         | <i>Ixodes ricinus</i>           |
| JAC18893.1         | Genbank         | <i>Amblyomma cajennense</i>     |
| JAC24826.1         | Genbank         | <i>Amblyomma parvum</i>         |
| JAC27776.1         | Genbank         | <i>Amblyomma triste</i>         |
| JAC27143.1         | Genbank         | <i>Amblyomma parvum</i>         |
| JAC27149.1         | Genbank         | <i>Amblyomma parvum</i>         |
| JAG91851.1         | Genbank         | <i>Amblyomma americanum</i>     |
| JAC18902.1         | Genbank         | <i>Amblyomma cajennense</i>     |
| JAG91726.1         | Genbank         | <i>Amblyomma americanum</i>     |
| JAC19610.1         | Genbank         | <i>Amblyomma cajennense</i>     |
| JAC18918.1         | Genbank         | <i>Amblyomma cajennense</i>     |
| JAC18937.1         | Genbank         | <i>Amblyomma cajennense</i>     |
| JAC19608.1         | Genbank         | <i>Amblyomma cajennense</i>     |
| JAC19605.1         | Genbank         | <i>Amblyomma cajennense</i>     |
| JAC19611.1         | Genbank         | <i>Amblyomma cajennense</i>     |
| JAC19604.1         | Genbank         | <i>Amblyomma cajennense</i>     |
| JAA60767.1         | Genbank         | <i>Rhipicephalus pulchellus</i> |
| JAC28501.1         | Genbank         | <i>Amblyomma triste</i>         |
| JAC27742.1         | Genbank         | <i>Amblyomma triste</i>         |
| JAC19000.1         | Genbank         | <i>Amblyomma cajennense</i>     |
| JAC18987.1         | Genbank         | <i>Amblyomma cajennense</i>     |

|            |           |                                 |
|------------|-----------|---------------------------------|
| JAC27176.1 | Genbank   | <i>Amblyomma parvum</i>         |
| JAC27182.1 | Genbank   | <i>Amblyomma parvum</i>         |
| JAC19683.1 | Genbank   | <i>Amblyomma cajennense</i>     |
| JAC19684.1 | Genbank   | <i>Amblyomma cajennense</i>     |
| JAC19139.1 | Genbank   | <i>Amblyomma cajennense</i>     |
| JAC19681.1 | Genbank   | <i>Amblyomma cajennense</i>     |
| JAC19128.1 | Genbank   | <i>Amblyomma cajennense</i>     |
| JAC19685.1 | Genbank   | <i>Amblyomma cajennense</i>     |
| JAC27265.1 | Genbank   | <i>Amblyomma parvum</i>         |
| JAC27987.1 | Genbank   | <i>Amblyomma triste</i>         |
| JAC23907.1 | Genbank   | <i>Amblyomma cajennense</i>     |
| JAC27222.1 | Genbank   | <i>Amblyomma parvum</i>         |
| JAG92131.1 | Genbank   | <i>Amblyomma americanum</i>     |
| JAA60809.1 | Genbank   | <i>Rhipicephalus pulchellus</i> |
| G3MSY7     | UniprotKB | <i>Amblyomma maculatum</i>      |
| JAC30584.1 | Genbank   | <i>Amblyomma triste</i>         |
| G3MSY6     | UniprotKB | <i>Amblyomma maculatum</i>      |
| JAC30583.1 | Genbank   | <i>Amblyomma triste</i>         |
| G3MSY5     | UniprotKB | <i>Amblyomma maculatum</i>      |
| JAC23894.1 | Genbank   | <i>Amblyomma cajennense</i>     |
| JAC23897.1 | Genbank   | <i>Amblyomma cajennense</i>     |
| JAC23881.1 | Genbank   | <i>Amblyomma cajennense</i>     |
| JAC23884.1 | Genbank   | <i>Amblyomma cajennense</i>     |
| JAC23883.1 | Genbank   | <i>Amblyomma cajennense</i>     |
| JAC23886.1 | Genbank   | <i>Amblyomma cajennense</i>     |
| JAC23882.1 | Genbank   | <i>Amblyomma cajennense</i>     |
| JAC23885.1 | Genbank   | <i>Amblyomma cajennense</i>     |
| JAC23887.1 | Genbank   | <i>Amblyomma cajennense</i>     |
| JAG92204.1 | Genbank   | <i>Amblyomma americanum</i>     |
| JAG92196.1 | Genbank   | <i>Amblyomma americanum</i>     |
| JAC23903.1 | Genbank   | <i>Amblyomma cajennense</i>     |
| JAC23898.1 | Genbank   | <i>Amblyomma cajennense</i>     |
| JAC26565.1 | Genbank   | <i>Amblyomma parvum</i>         |
| JAC30582.1 | Genbank   | <i>Amblyomma triste</i>         |
| JAC30579.1 | Genbank   | <i>Amblyomma triste</i>         |
| JAC30580.1 | Genbank   | <i>Amblyomma triste</i>         |
| JAC30575.1 | Genbank   | <i>Amblyomma triste</i>         |
| JAC30578.1 | Genbank   | <i>Amblyomma triste</i>         |
| JAC30574.1 | Genbank   | <i>Amblyomma triste</i>         |
| JAC30577.1 | Genbank   | <i>Amblyomma triste</i>         |
| JAC30576.1 | Genbank   | <i>Amblyomma triste</i>         |
| JAA56354.1 | Genbank   | <i>Rhipicephalus pulchellus</i> |
| C9W1Q9     | UniprotKB | <i>Rhipicephalus sanguineus</i> |
| KY696676.1 | Genbank   | <i>Rhipicephalus microplus</i>  |
| KY696675.1 | Genbank   | <i>Rhipicephalus microplus</i>  |

|                      |            |                                                 |
|----------------------|------------|-------------------------------------------------|
| JAA60776.1           | Genbank    | <i>Rhipicephalus pulchellus</i>                 |
| JAA60817.1           | Genbank    | <i>Rhipicephalus pulchellus</i>                 |
| JAA60787.1           | Genbank    | <i>Rhipicephalus pulchellus</i>                 |
| JAA60785.1           | Genbank    | <i>Rhipicephalus pulchellus</i>                 |
| JAA60838.1           | Genbank    | <i>Rhipicephalus pulchellus</i>                 |
| JAA65011.1           | Genbank    | <i>Rhipicephalus pulchellus</i>                 |
| GADI01004698.1/1-98  | VectorBase | <i>Ixodes ricinus</i>                           |
| GADI01004698.1/1-98  | VectorBase | <i>Ixodes ricinus</i>                           |
| GADI01007577.1/1-100 | VectorBase | <i>Ixodes ricinus</i>                           |
| GADI01007577.1/1-100 | VectorBase | <i>Ixodes ricinus</i>                           |
| Q09JP0               | UniprotKB  | <i>Argas monolakensis</i> (Mono lake bird tick) |
| JAG92081.1           | Genbank    | <i>Amblyomma americanum</i>                     |
| JAC27926.1           | Genbank    | <i>Amblyomma triste</i>                         |
| JAC19108.1           | Genbank    | <i>Amblyomma cajennense</i>                     |
| JAC27217.1           | Genbank    | <i>Amblyomma parvum</i>                         |
| GBIH01002127.1/1-69  | VectorBase | <i>Ixodes ricinus</i>                           |
| GBIH01002127.1/1-69  | VectorBase | <i>Ixodes ricinus</i>                           |
| JAC19007.1           | Genbank    | <i>Amblyomma cajennense</i>                     |
| JAG92086.1           | Genbank    | <i>Amblyomma americanum</i>                     |
| KY696673.1           | Genbank    | <i>Rhipicephalus microplus</i>                  |
| JAC26686.1           | Genbank    | <i>Amblyomma parvum</i>                         |
| JAC26685.1           | Genbank    | <i>Amblyomma parvum</i>                         |
| JAA60747.1           | Genbank    | <i>Rhipicephalus pulchellus</i>                 |
| JAA53866.1           | Genbank    | <i>Rhipicephalus pulchellus</i>                 |
| JAA64989.1           | Genbank    | <i>Rhipicephalus pulchellus</i>                 |
| JAA54118.1           | Genbank    | <i>Rhipicephalus pulchellus</i>                 |
| JAC30561.1           | Genbank    | <i>Amblyomma triste</i>                         |
| G3MKY5_9ACAR         | UniprotKB  | <i>Amblyomma maculatum</i>                      |
| JAC23850.1           | Genbank    | <i>Amblyomma cajennense</i>                     |
| JAC30571.1           | Genbank    | <i>Amblyomma triste</i>                         |
| JAC30557.1           | Genbank    | <i>Amblyomma triste</i>                         |
| JAC30565.1           | Genbank    | <i>Amblyomma triste</i>                         |
| JAC30564.1           | Genbank    | <i>Amblyomma triste</i>                         |
| JAC30567.1           | Genbank    | <i>Amblyomma triste</i>                         |
| G3ML31_9ACAR         | UniprotKB  | <i>Amblyomma maculatum</i>                      |
| JAC24466.1           | Genbank    | <i>Amblyomma cajennense</i>                     |
| JAC24465.1           | Genbank    | <i>Amblyomma cajennense</i>                     |
| JAC27213.1           | Genbank    | <i>Amblyomma parvum</i>                         |
| JAC26564.1           | Genbank    | <i>Amblyomma parvum</i>                         |
| JAC23849.1           | Genbank    | <i>Amblyomma cajennense</i>                     |
| JAC23848.1           | Genbank    | <i>Amblyomma cajennense</i>                     |
| JAC23847.1           | Genbank    | <i>Amblyomma cajennense</i>                     |
| JAG92108.1           | Genbank    | <i>Amblyomma americanum</i>                     |
| JAC27053.1           | Genbank    | <i>Amblyomma parvum</i>                         |

|              |           |                                 |
|--------------|-----------|---------------------------------|
| JAC27057.1   | Genbank   | <i>Amblyomma parvum</i>         |
| JAC27055.1   | Genbank   | <i>Amblyomma parvum</i>         |
| JAC24473.1   | Genbank   | <i>Amblyomma cajennense</i>     |
| JAC24470.1   | Genbank   | <i>Amblyomma cajennense</i>     |
| JAC24468.1   | Genbank   | <i>Amblyomma cajennense</i>     |
| JAC24471.1   | Genbank   | <i>Amblyomma cajennense</i>     |
| JAC24464.1   | Genbank   | <i>Amblyomma cajennense</i>     |
| JAC24462.1   | Genbank   | <i>Amblyomma cajennense</i>     |
| JAC24461.1   | Genbank   | <i>Amblyomma cajennense</i>     |
| JAC24463.1   | Genbank   | <i>Amblyomma cajennense</i>     |
| JAC24472.1   | Genbank   | <i>Amblyomma cajennense</i>     |
| JAC24467.1   | Genbank   | <i>Amblyomma cajennense</i>     |
| JAC27054.1   | Genbank   | <i>Amblyomma parvum</i>         |
| JAC24469.1   | Genbank   | <i>Amblyomma cajennense</i>     |
| G3MKY4       | UniprotKB | <i>Amblyomma maculatum</i>      |
| JAC30696.1   | Genbank   | <i>Amblyomma triste</i>         |
| JAC30698.1   | Genbank   | <i>Amblyomma triste</i>         |
| JAC30697.1   | Genbank   | <i>Amblyomma triste</i>         |
| JAC26666.1   | Genbank   | <i>Amblyomma parvum</i>         |
| G3MKK4       | UniprotKB | <i>Amblyomma maculatum</i>      |
| G3MFD0_9ACAR | UniprotKB | <i>Amblyomma maculatum</i>      |
| JAC30642.1   | Genbank   | <i>Amblyomma triste</i>         |
| JAC23986.1   | Genbank   | <i>Amblyomma cajennense</i>     |
| JAC23985.1   | Genbank   | <i>Amblyomma cajennense</i>     |
| JAG92346.1   | Genbank   | <i>Amblyomma americanum</i>     |
| JAC23940.1   | Genbank   | <i>Amblyomma cajennense</i>     |
| JAC23941.1   | Genbank   | <i>Amblyomma cajennense</i>     |
| JAG92343.1   | Genbank   | <i>Amblyomma americanum</i>     |
| JAC29290.1   | Genbank   | <i>Amblyomma triste</i>         |
| JAC29289.1   | Genbank   | <i>Amblyomma triste</i>         |
| KY696672.1   | Genbank   | <i>Rhipicephalus microplus</i>  |
| JAB70277.1   | Genbank   | <i>Ixodes ricinus</i>           |
| JAA71053.1   | Genbank   | <i>Ixodes ricinus</i>           |
| JAA70397.1   | Genbank   | <i>Ixodes ricinus</i>           |
| KY696660.1   | Genbank   | <i>Ixodes holocyclus</i>        |
| KY696664.1   | Genbank   | <i>Ixodes holocyclus</i>        |
| KY696670.1   | Genbank   | <i>Ixodes holocyclus</i>        |
| KY696663.1   | Genbank   | <i>Ixodes holocyclus</i>        |
| KY696662.1   | Genbank   | <i>Ixodes holocyclus</i>        |
| KY696665.1   | Genbank   | <i>Ixodes holocyclus</i>        |
| KY696669.1   | Genbank   | <i>Ixodes holocyclus</i>        |
| JAA60771.1   | Genbank   | <i>Rhipicephalus pulchellus</i> |
| P0C8E9       | UniprotKB | <i>Rhipicephalus sanguineus</i> |
| JAA54802.1   | Genbank   | <i>Rhipicephalus pulchellus</i> |
| JAA60789.1   | Genbank   | <i>Rhipicephalus pulchellus</i> |

|                      |            |                                 |
|----------------------|------------|---------------------------------|
| JAA60818.1           | Genbank    | <i>Rhipicephalus pulchellus</i> |
| C9W1C3               | UniprotKB  | <i>Rhipicephalus sanguineus</i> |
| JAA60799.1           | Genbank    | <i>Rhipicephalus pulchellus</i> |
| JAA60777.1           | Genbank    | <i>Rhipicephalus pulchellus</i> |
| C9W1D9               | UniprotKB  | <i>Rhipicephalus sanguineus</i> |
| KY696666.1           | Genbank    | <i>Ixodes holocyclus</i>        |
| JAC93358.1           | Genbank    | <i>Ixodes ricinus</i>           |
| GBIH01001339.1/1-150 | VectorBase | <i>Ixodes ricinus</i>           |
| GBIH01001339.1/1-150 | VectorBase | <i>Ixodes ricinus</i>           |
| GBIH01001345.1/1-143 | VectorBase | <i>Ixodes ricinus</i>           |
| GBIH01001345.1/1-143 | VectorBase | <i>Ixodes ricinus</i>           |
| JAA65551.1           | Genbank    | <i>Ixodes ricinus</i>           |
| JAC92770.1           | Genbank    | <i>Ixodes ricinus</i>           |
| GBIH01001335.1/1-152 | VectorBase | <i>Ixodes ricinus</i>           |
| GBIH01001335.1/1-152 | VectorBase | <i>Ixodes ricinus</i>           |
| GADI01003281.1/1-157 | VectorBase | <i>Ixodes ricinus</i>           |
| GADI01003281.1/1-157 | VectorBase | <i>Ixodes ricinus</i>           |
| JAA67927.1           | Genbank    | <i>Ixodes ricinus</i>           |
| GADI01006018.1/1-162 | VectorBase | <i>Ixodes ricinus</i>           |
| GADI01006018.1/1-162 | VectorBase | <i>Ixodes ricinus</i>           |
| JAC93377.1           | Genbank    | <i>Ixodes ricinus</i>           |
| GADI01003252.1/1-154 | VectorBase | <i>Ixodes ricinus</i>           |
| GADI01003252.1/1-154 | VectorBase | <i>Ixodes ricinus</i>           |
| GADI01003291.1/1-158 | VectorBase | <i>Ixodes ricinus</i>           |
| GADI01003291.1/1-158 | VectorBase | <i>Ixodes ricinus</i>           |
| JAC93372.1           | Genbank    | <i>Ixodes ricinus</i>           |
| JAC93373.1           | Genbank    | <i>Ixodes ricinus</i>           |
| GBBN01015718.1/1-151 | VectorBase | <i>Ixodes scapularis</i>        |
| GBBN01015718.1/1-151 | VectorBase | <i>Ixodes scapularis</i>        |
| JAA67835.1           | Genbank    | <i>Ixodes ricinus</i>           |
| JAA65508.1           | Genbank    | <i>Ixodes ricinus</i>           |
| JAC93369.1           | Genbank    | <i>Ixodes ricinus</i>           |
| JAA71946.1           | Genbank    | <i>Ixodes ricinus</i>           |
| JAC93366.1           | Genbank    | <i>Ixodes ricinus</i>           |
| GBIH01001350.1/1-141 | VectorBase | <i>Ixodes ricinus</i>           |
| GBIH01001350.1/1-141 | VectorBase | <i>Ixodes ricinus</i>           |
| JAC93364.1           | Genbank    | <i>Ixodes ricinus</i>           |
| JAC93379.1           | Genbank    | <i>Ixodes ricinus</i>           |
| JAC93396.1           | Genbank    | <i>Ixodes ricinus</i>           |
| JAA65581.1           | Genbank    | <i>Ixodes ricinus</i>           |
| JAC93383.1           | Genbank    | <i>Ixodes ricinus</i>           |
| JAA68201.1           | Genbank    | <i>Ixodes ricinus</i>           |
| JAA67791.1           | Genbank    | <i>Ixodes ricinus</i>           |
| JAA65625.1           | Genbank    | <i>Ixodes ricinus</i>           |
| GBIH01001355.1/1-133 | VectorBase | <i>Ixodes ricinus</i>           |

|                      |            |                                 |
|----------------------|------------|---------------------------------|
| GBIH01001355.1/1-133 | VectorBase | <i>Ixodes ricinus</i>           |
| JAA70749.1           | Genbank    | <i>Ixodes ricinus</i>           |
| GBIH01001354.1/1-133 | VectorBase | <i>Ixodes ricinus</i>           |
| GBIH01001354.1/1-133 | VectorBase | <i>Ixodes ricinus</i>           |
| JAC93374.1           | Genbank    | <i>Ixodes ricinus</i>           |
| JAA67827.1           | Genbank    | <i>Ixodes ricinus</i>           |
| GADI01003397.1/1-173 | VectorBase | <i>Ixodes ricinus</i>           |
| GADI01003397.1/1-173 | VectorBase | <i>Ixodes ricinus</i>           |
| JAG92134.1           | Genbank    | <i>Amblyomma americanum</i>     |
| JAA55737.1           | Genbank    | <i>Rhipicephalus pulchellus</i> |
| JAA68608.1           | Genbank    | <i>Ixodes ricinus</i>           |
| JAB75472.1           | Genbank    | <i>Ixodes ricinus</i>           |
| JAG92019.1           | Genbank    | <i>Amblyomma americanum</i>     |
| A0A0C9R596           | UniprotKB  | <i>Amblyomma americanum</i>     |
| KY696661.1           | Genbank    | <i>Ixodes holocyclus</i>        |
| JAG91989.1           | Genbank    | <i>Amblyomma americanum</i>     |
| JAC19654.1           | Genbank    | <i>Amblyomma cajennense</i>     |
| JAC24842.1           | Genbank    | <i>Amblyomma parvum</i>         |
| JAC27912.1           | Genbank    | <i>Amblyomma triste</i>         |
| JAC27939.1           | Genbank    | <i>Amblyomma triste</i>         |
| JAC27940.1           | Genbank    | <i>Amblyomma triste</i>         |
| JAB71388.1           | Genbank    | <i>Ixodes ricinus</i>           |
| JAA68126.1           | Genbank    | <i>Ixodes ricinus</i>           |
| JAB70275.1           | Genbank    | <i>Ixodes ricinus</i>           |
| JAC92340.1           | Genbank    | <i>Ixodes ricinus</i>           |
| JAB71160.1           | Genbank    | <i>Ixodes ricinus</i>           |
| P0C8E7               | UniprotKB  | <i>Rhipicephalus sanguineus</i> |
| C9W1N8               | UniprotKB  | <i>Rhipicephalus sanguineus</i> |
| JAA60786.1           | Genbank    | <i>Rhipicephalus pulchellus</i> |
| JAC19009.1           | Genbank    | <i>Amblyomma cajennense</i>     |
| JAG92268.1           | Genbank    | <i>Amblyomma americanum</i>     |
| JAC27175.1           | Genbank    | <i>Amblyomma parvum</i>         |
| JAC27188.1           | Genbank    | <i>Amblyomma parvum</i>         |
| JAC27189.1           | Genbank    | <i>Amblyomma parvum</i>         |
| JAC27187.1           | Genbank    | <i>Amblyomma parvum</i>         |
| JAC18992.1           | Genbank    | <i>Amblyomma cajennense</i>     |
| JAC18993.1           | Genbank    | <i>Amblyomma cajennense</i>     |
| JAC19634.1           | Genbank    | <i>Amblyomma cajennense</i>     |
| JAG91729.1           | Genbank    | <i>Amblyomma americanum</i>     |
| JAG91744.1           | Genbank    | <i>Amblyomma americanum</i>     |
| JAG91651.1           | Genbank    | <i>Amblyomma americanum</i>     |
| JAC27763.1           | Genbank    | <i>Amblyomma triste</i>         |
| JAC27735.1           | Genbank    | <i>Amblyomma triste</i>         |
| JAG92120.1           | Genbank    | <i>Amblyomma americanum</i>     |
| JAC27963.1           | Genbank    | <i>Amblyomma triste</i>         |

|            |         |                             |
|------------|---------|-----------------------------|
| JAC19052.1 | Genbank | <i>Amblyomma cajennense</i> |
| JAG92333.1 | Genbank | <i>Amblyomma americanum</i> |
| JAC27944.1 | Genbank | <i>Amblyomma triste</i>     |
| JAG92380.1 | Genbank | <i>Amblyomma americanum</i> |
| JAC19034.1 | Genbank | <i>Amblyomma cajennense</i> |
| JAC19650.1 | Genbank | <i>Amblyomma cajennense</i> |
| JAC19663.1 | Genbank | <i>Amblyomma cajennense</i> |
| JAC19655.1 | Genbank | <i>Amblyomma cajennense</i> |
| JAC19653.1 | Genbank | <i>Amblyomma cajennense</i> |
| JAC19651.1 | Genbank | <i>Amblyomma cajennense</i> |
| JAC19652.1 | Genbank | <i>Amblyomma cajennense</i> |



**Figure S1. Simulated fluorescence anisotropy binding curves.** Shown are the fluorescence anisotropy competitive displacement curves simulated for binding of evasins to chemokines with 10 different  $K_d$  values (in the range 1-1000 nM, different curves on the same panel) and for four different binding affinities between the chemokine and the fluorescent peptide (FI-Pep) in the four panels (20 nM, top panel; 50 nM, second panel; 100 nM, third panel; and 200 nM, bottom panel). In all simulations the concentrations of chemokine (100 nM) and FI-Pep (10 nM) are held constant.

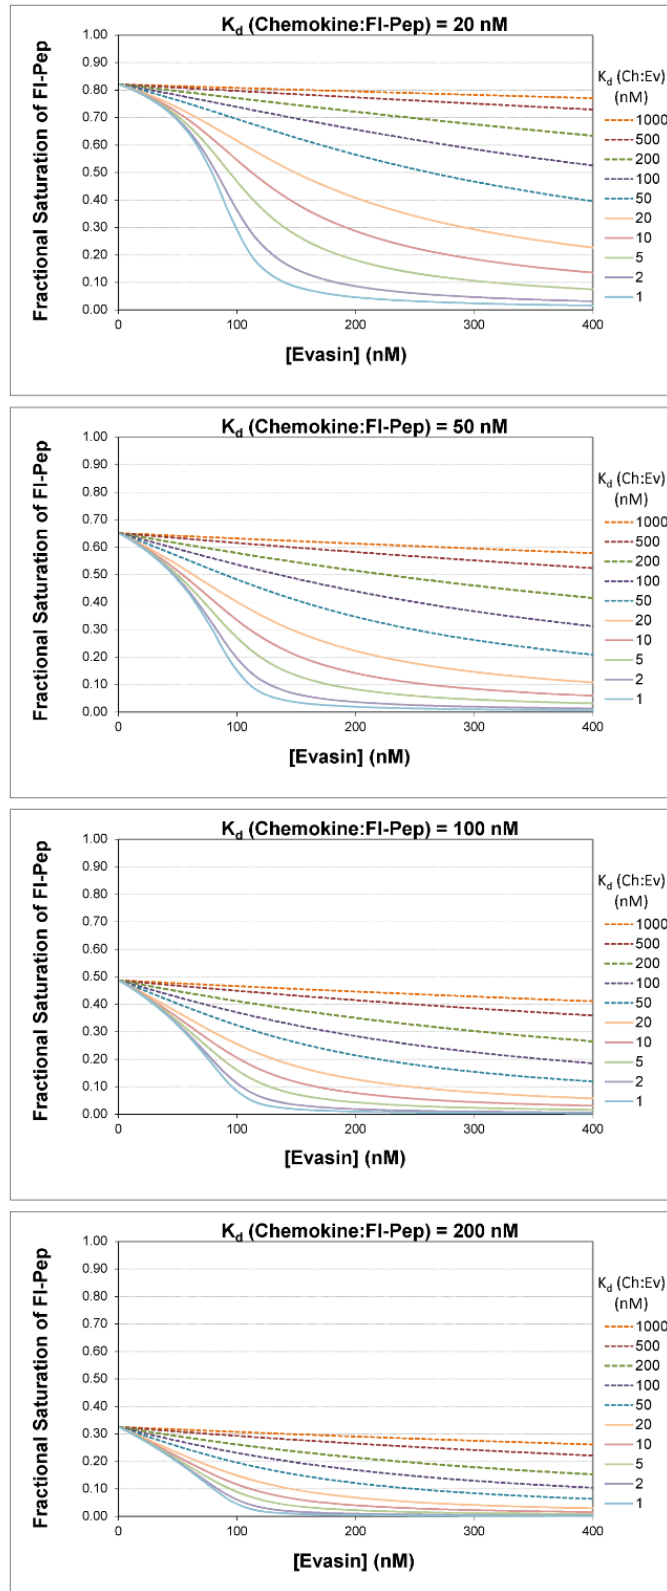

**Figure S2. Chemokine binding curves of candidate evasins.** Shown are the fluorescence anisotropy competitive displacement curves obtained for binding of nine evasin candidates against a panel of 6 human CC chemokines. Data points represent the mean anisotropy  $\pm$  SEM from duplicate assays performed three times independently. Solid lines are the best fits to a competitive displacement model (see *Experimental Procedures* for details).

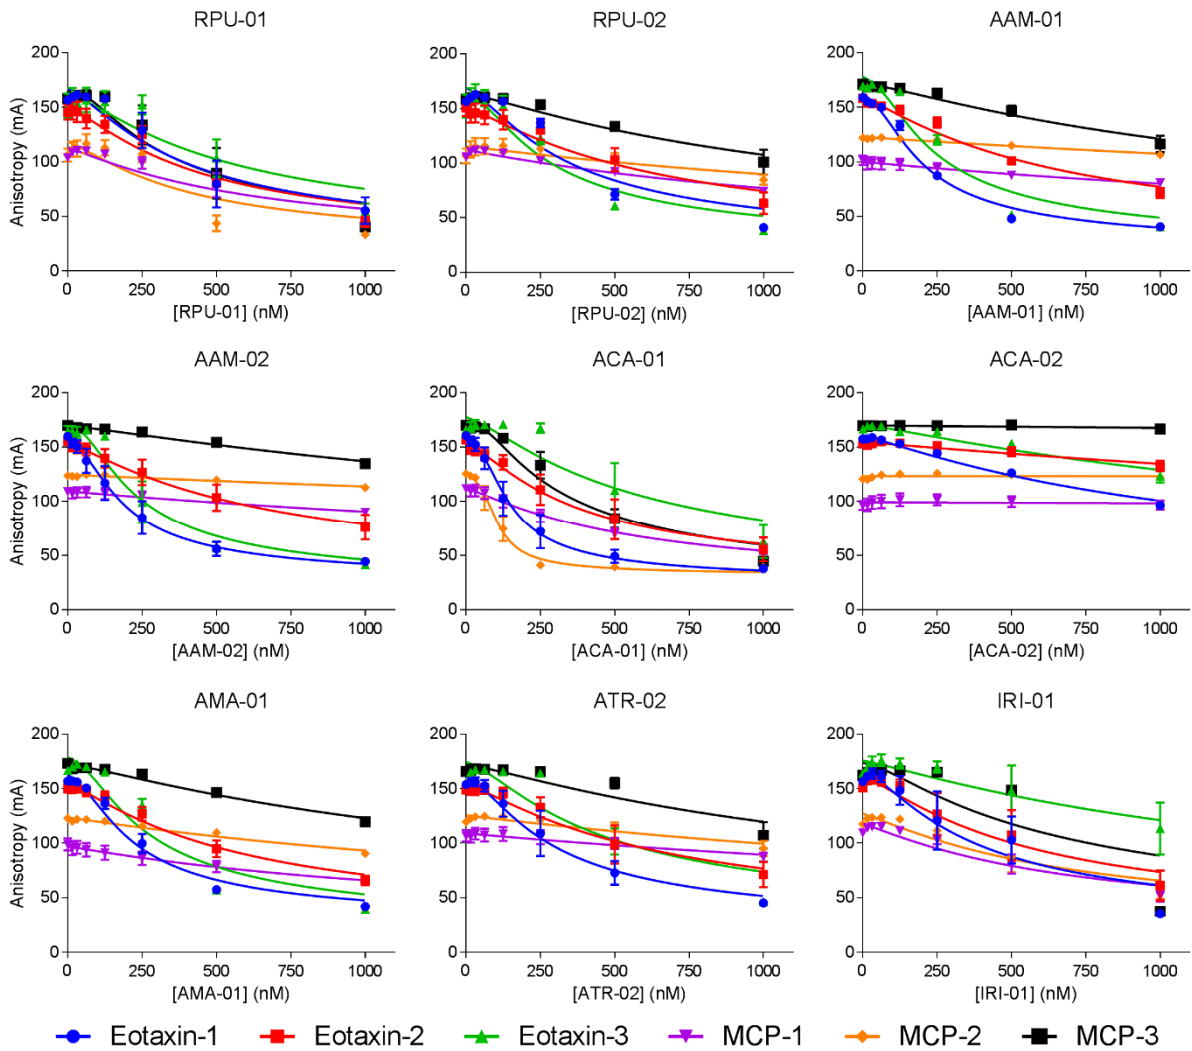

**Figure S3. Chemokine binding affinity profiles of purified evasins.** (A-E) Affinities ( $pK_d$  values), derived from the competitive fluorescence anisotropy binding curves (Figs. 3 and 4) for binding of purified evasins to each of five CC chemokines. Each panel shows the binding profile for one evasin: (A) RSA evasin-4, (B) RPU-01, (C) ACA-01, (D) IRI-01, and (E) IHO-01. Data represent the average  $\pm$  SEM of values from three independent experiments, each recorded in duplicate. Significance (multiple t-tests) is shown as \*  $p < 0.05$ , \*\*  $p < 0.01$  and \*\*\*  $p < 0.001$ .

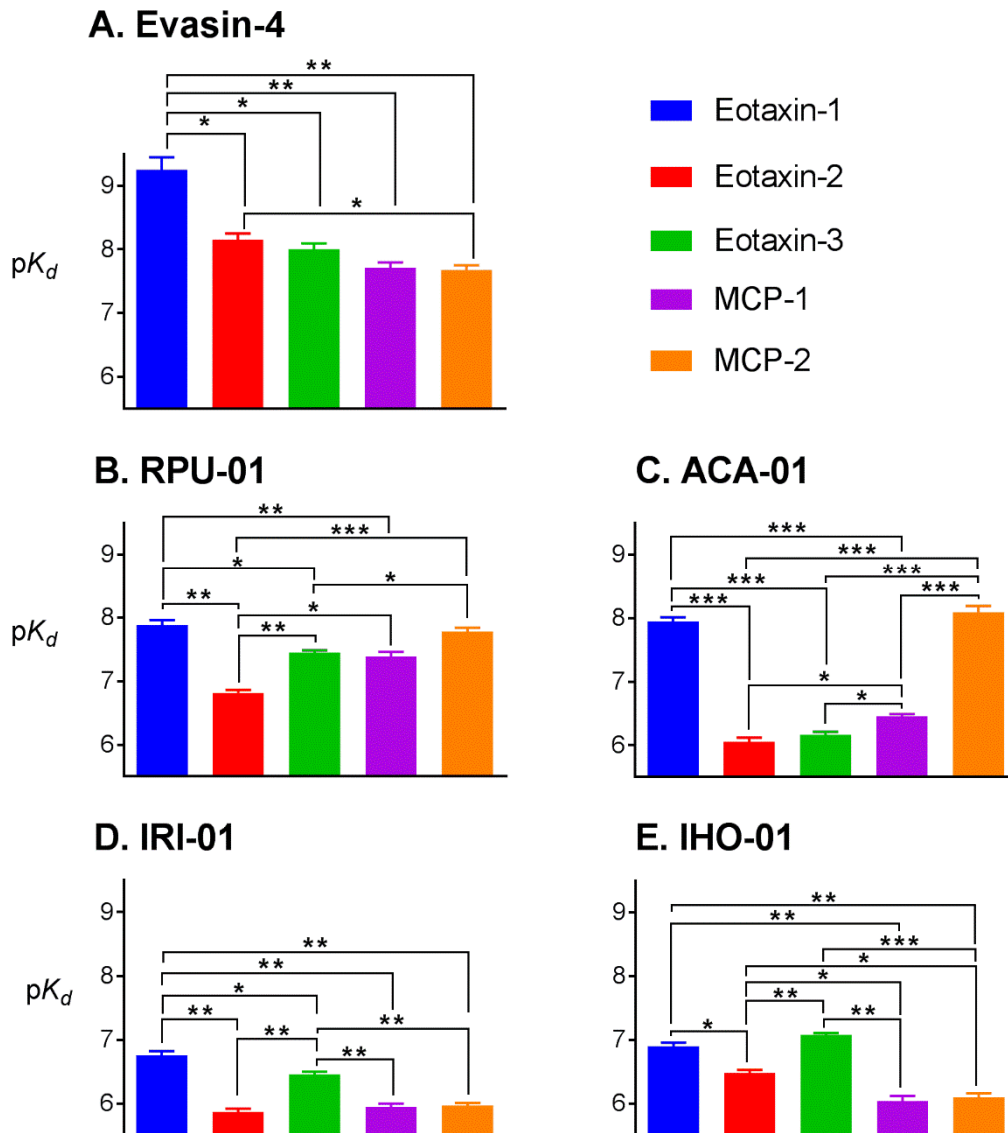

**Figure S4. Chemokine inhibition of forskolin-induced cAMP production.** Shown are concentration-response curves for inhibition of forskolin (10  $\mu$ M)-induced production of cAMP in: (A) cMyc-FLAG-CCR2 TREx HEK293 cells by the chemokines MCP-1 and MCP-2; or (B) cMyc-FLAG-CCR3 FlpIn TREx HEK293 cells by the chemokines eotaxin-1 and eotaxin-2. cAMP was detected via a BRET biosensor, as described in the *Experimental Procedures*. Data points represent the average  $\pm$  SEM of values from three independent experiments, each recorded in duplicate.

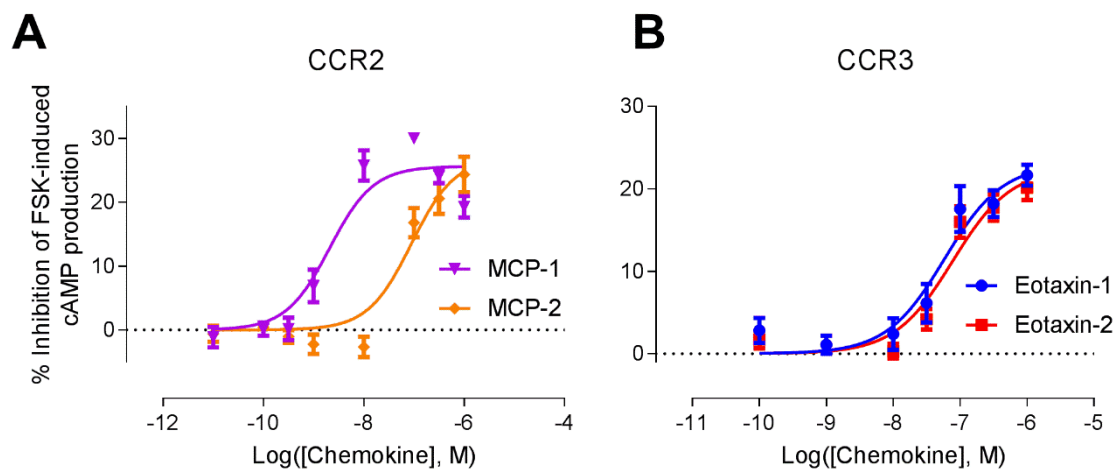

Supplement: 10.1074_M117.807255_jbc.M117.807255-1.pdf [file 10.1074_M117.807255_jbc.M117.807255-1.pdf]
